# Supplementary material
Source: Research Square preprint supplement (doi:10.21203/rs.3.rs-9993777/v1)
Supplement: Supplementary file 1 [file 90598c7c3bbef14a44f04a00.docx]

**Supplementary Table S1.** Sensitivity analyses for the 90-day landmark cohort

| **Variable** | **Full modela HR (95% CI), P** | **Parsimonious modelb HR (95% CI), P** |
| --- | --- | --- |
| Palliative care-only (reference) | 1.000 | 1.000 |
| Palliative chemotherapy-only | 0.028 (0.004–0.180), <0.001 | 0.047 (0.010–0.209), <0.001 |
| **Quasi-BTS** | **0.005 (0.001–0.042), <0.001** | **0.012 (0.002–0.065), <0.001** |
| Age ≥ 80 years | 7.869 (2.443–25.345), <0.001 | — |
| Age (continuous, years) | — | 1.016 (0.973–1.059), 0.477 |
| ASA II (vs I) | 0.811 (0.213–3.091), 0.759 | — |
| ASA III (vs I) | 0.398 (0.142–1.112), 0.079 | — |
| Liver metastasis | 0.853 (0.195–3.725), 0.833 | 0.763 (0.339–1.714), 0.512 |
| Lung metastasis | 0.398 (0.141–1.122), 0.081 | — |
| Peritoneal metastasis | 0.783 (0.185–3.311), 0.740 | — |
| Use of anti-VEGF or anti-EGFR therapy | 0.345 (0.122–0.980), 0.046 | 0.330 (0.124–0.883), 0.027 |

Cohort: n = 40 (palliative care-only, n = 7; palliative chemotherapy-only, n = 17; Quasi-BTS, n = 16) after exclusion of 13 patients (24.5%) who died within 90 days of stent placement. Reference categories: palliative care-only for treatment group; ASA I for ASA classification.

Kaplan–Meier log-rank: χ² = 52.59, df = 2, P < 0.001.

a Full model: same covariates as the primary analysis (Table 3).

b Parsimonious model: restricted to four key covariates (treatment group, age, liver metastasis, and anti-VEGF/anti-EGFR therapy use) to address the suboptimal events-per-variable ratio in the full model.

CI, confidence interval; HR, hazard ratio; VEGF, vascular endothelial growth factor; EGFR, epidermal growth factor receptor; ASA, American Society of Anesthesiologists.
